# Supplementary material for: Vesicular stomatitis forecasting based on Google Trends
Source: PLoS One. 2018 Jan 31;13(1):e0192141. doi: 10.1371/journal.pone.0192141 (PMC5792013; doi:10.1371/journal.pone.0192141)
Supplement: S8 Table — (XLSX) [file pone.0192141.s008.xlsx]

## Sheet: Sheet1
S8 Table. AdaBoost combined with weak classifiers’ model from keywords
										Threshold
Classifier	1				2				3				4				5
	Training set				Training set				Training set				Training set				Training set
	SN(%)	SP(%)	ACC(%)	MCC(%)	SN(%)	SP(%)	ACC(%)	MCC(%)	SN(%)	SP(%)	ACC(%)	MCC(%)	SN(%)	SP(%)	ACC(%)	MCC(%)	SN(%)	SP(%)	ACC(%)	MCC(%)
BayesianLogisticRegreesion	0.352113	0.682692	0.548571	0.0363062	0.747748	0.34375	0.6	0.0975488	0.820312	0.382979	0.702857	0.21273	0.903704	0.375	0.782857	0.319229	0.86014	0.21875	0.742857	0.0844212
BayesNet	0	1	0.594286	#DIV/0!	0.702703	0.609375	0.668571	0.305442	0.859375	0.404255	0.737143	0.28616	0.89697	0.225	0.765854	0.145248	0.888112	0.3125	0.782857	0.218032
ComplementNaiveBayes	0.450704	0.576923	0.525714	0.0273691	0.540541	0.671875	0.588571	0.205178	0.625	0.787234	0.668571	0.365567	0.607407	0.825	0.657143	0.3632	0.622378	0.90625	0.674286	0.409223
DMNBtext	0.777778	0.614458	0.622857	0.176432	0.918919	0.0625	0.605714	-0.0341266	1	0	0.731429	#DIV/0!	1	0	0.771429	#DIV/0!	1	0	0.817143	#DIV/0!
NaiveBayes	0.464789	0.615385	0.554286	0.0798389	0.765766	0.515625	0.674286	0.286686	0.875	0.446809	0.76	0.34931	0.866667	0.425	0.765714	0.306186	0.853147	0.4375	0.777143	0.280873
NaiveBayesMultinomial	0.478873	0.634615	0.571429	0.113244	0.630631	0.5625	0.605714	0.187389	0.664062	0.723404	0.68	0.345963	0.711111	0.675	0.702857	0.334521	0.657343	0.875	0.697143	0.414549
NaiveBayesMultinomialUpdateable	0.464789	0.644231	0.571429	0.109271	0.657658	0.5625	0.622857	0.214639	0.65625	0.744681	0.68	0.357087	0.748148	0.625	0.72	0.331454	0.657343	0.875	0.697143	0.414549
NaiveBayesUpdateable	0.464789	0.615385	0.554286	0.0798389	0.765766	0.515625	0.674286	0.286686	0.875	0.446809	0.76	0.34931	0.806897	0.425	0.724324	0.222504	0.853147	0.4375	0.777143	0.280873
MultilayerPerceptron	0.450704	0.673077	0.582857	0.125405	0.711712	0.453125	0.617143	0.166605	0.828125	0.489362	0.737143	0.32196	0.807407	0.425	0.72	0.226686	0.895105	0.40625	0.805714	0.317749
RBFNetwork	0.43662	0.673077	0.577143	0.111477	0.837838	0.515625	0.72	0.374627	0.875	0.489362	0.771429	0.388047	0.82963	0.45	0.742857	0.277227	0.902098	0.25	0.782857	0.177341
SimpleLogistic	0.338028	0.673077	0.537143	0.0115841	0.81982	0.3125	0.634286	0.151768	0.921875	0.340426	0.765714	0.326869	0.918519	0.175	0.748571	0.129273	0.916084	0.1875	0.782857	0.13181
SMO	0.366197	0.778846	0.611429	0.158621	0.747748	0.265625	0.571429	0.0147365	0.78125	0.404255	0.68	0.185505	0.837037	0.325	0.72	0.170103	0.86014	0.21875	0.742857	0.0844212
SPegasos	0.450704	0.663462	0.577143	0.115327	0.702703	0.359375	0.577143	0.0640943	0.820312	0.446809	0.72	0.272898	0.837037	0.275	0.708571	0.12027	0.86014	0.34375	0.765714	0.206432
VotedPerceptron	0.225352	0.711538	0.514286	-0.070399	0.801802	0.28125	0.611429	0.0952585	0.875	0.234043	0.702857	0.133794	0.896296	0.25	0.748571	0.178581	0.909091	0.21875	0.782857	0.155322
IB1	0.478873	0.596154	0.548571	0.0743258	0.567568	0.40625	0.508571	-0.0255261	0.75	0.489362	0.68	0.228527	0.718519	0.45	0.657143	0.151697	0.804196	0.3125	0.714286	0.109407
IBk	0.464789	0.615385	0.554286	0.0798389	0.612613	0.453125	0.554286	0.0643399	0.796875	0.489362	0.714286	0.28255	0.807407	0.425	0.72	0.226686	0.846154	0.28125	0.742857	0.128992
KStar	0.450704	0.673077	0.582857	0.125405	0.630631	0.5625	0.605714	0.187389	0.632812	0.553191	0.611429	0.167192	0.718519	0.525	0.674286	0.216309	0.804196	0.625	0.771429	0.371857
LWL	0.366197	0.644231	0.531429	0.0106676	0.747748	0.578125	0.685714	0.324823	0.851562	0.340426	0.714286	0.212731	0.896296	0.475	0.8	0.398581	0.832168	0.34375	0.742857	0.170002
AdaBoostM1	0.380282	0.692308	0.565714	0.0753987	0.63964	0.484375	0.582857	0.121641	0.84375	0.404255	0.725714	0.264127	0.859259	0.45	0.765714	0.318038	0.874126	0.3125	0.771429	0.196778
AttributeSelectedClassifier	0.366197	0.692308	0.56	0.0610283	0.72973	0.5	0.645714	0.231331	0.84375	0.638298	0.788571	0.472938	0.881481	0.3	0.748571	0.20787	0.902098	0.15625	0.765714	0.0724985
Bagging	0.309859	0.711538	0.548571	0.022991	0.72973	0.5	0.645714	0.231331	0.851562	0.382979	0.725714	0.254585	0.896296	0.35	0.771429	0.282109	0.909091	0.3125	0.8	0.253518
ClassificationViaClustering	0.338028	0.663462	0.531429	0.00154736	0.45045	0.671875	0.531429	0.119984	0.617188	0.702128	0.64	0.283612	0.562963	0.7	0.594286	0.220846	0.643357	0.6875	0.651429	0.259371
ClassificationViaRegression	0.408451	0.663462	0.56	0.0733157	0.72973	0.421875	0.617143	0.155807	0.8125	0.446809	0.714286	0.262962	0.888889	0.45	0.788571	0.363792	0.888112	0.1875	0.76	0.0881609
CVParameterSelection	0	1	0.594286	#DIV/0!	1	0	0.634286	#DIV/0!	1	0	0.731429	#DIV/0!	1	0	0.771429	#DIV/0!	1	0	0.817143	#DIV/0!
Dagging	0.380282	0.615385	0.52	-0.00437779	0.756757	0.328125	0.6	0.0916312	0.90625	0.212766	0.72	0.159112	0.859259	0.35	0.742857	0.224637	0.881119	0.15625	0.748571	0.0435709
Decorate	0.366197	0.692308	0.56	0.0610283	0.72973	0.4375	0.622857	0.171103	0.890625	0.446809	0.771429	0.37389	0.837037	0.4	0.737143	0.241413	0.881119	0.34375	0.782857	0.237102
END	0.380282	0.740385	0.594286	0.128275	0.783784	0.484375	0.674286	0.278209	0.828125	0.510638	0.742857	0.341096	0.888889	0.5	0.8	0.408248	0.86014	0.3125	0.76	0.177068
FilteredClassifier	0.239437	0.730769	0.531429	-0.0334733	0.747748	0.46875	0.645714	0.221512	0.835938	0.446809	0.731429	0.293427	0.881481	0.3	0.748571	0.20787	0.846154	0.34375	0.754286	0.187662
Grading	0	1	0.594286	#DIV/0!	1	0	0.634286	#DIV/0!	1	0	0.731429	#DIV/0!	1	0	0.771429	#DIV/0!	1	0	0.817143	#DIV/0!
LogitBoost	0.507042	0.615385	0.571429	0.121283	0.666667	0.5	0.605714	0.164257	0.84375	0.425532	0.731429	0.284226	0.844444	0.35	0.731429	0.204124	0.895105	0.40625	0.805714	0.317749
MultiBoostAB	0.295775	0.75	0.565714	0.0507127	0.72973	0.484375	0.64	0.216402	0.859375	0.382979	0.731429	0.265733	0.911111	0.3	0.771429	0.2577	0.965035	0.03125	0.794286	-0.007892
MultiClassClassifier	0.464789	0.721154	0.617143	0.190893	0.675676	0.3125	0.542857	-0.0122084	0.84375	0.468085	0.742857	0.323615	0.822222	0.35	0.714286	0.175402	0.874126	0.40625	0.788571	0.283871
MultiScheme	0	1	0.594286	#DIV/0!	1	0	0.634286	#DIV/0!	1	0	0.731429	#DIV/0!	1	0	0.771429	#DIV/0!	1	0	0.817143	#DIV/0!
OrdinalClassClassifier	0.380282	0.740385	0.594286	0.128275	0.783784	0.484375	0.674286	0.278209	0.828125	0.510638	0.742857	0.341096	0.888889	0.5	0.8	0.408248	0.86014	0.3125	0.76	0.177068
RacedIncrementalLogitBoost	0	1	0.594286	#DIV/0!	1	0	0.634286	#DIV/0!	1	0	0.731429	#DIV/0!	1	0	0.771429	#DIV/0!	1	0	0.817143	#DIV/0!
RandomCommittee	0.549296	0.625	0.594286	0.172187	0.828829	0.3125	0.64	0.163561	0.921875	0.425532	0.788571	0.408552	0.918519	0.425	0.805714	0.393468	0.916084	0.25	0.794286	0.201785
RandomSubSpace	0.28169	0.721154	0.542857	0.00311021	0.765766	0.46875	0.657143	0.242134	0.890625	0.489362	0.782857	0.41246	0.866667	0.375	0.754286	0.259425	0.881119	0.3125	0.777143	0.207194
RotationForest	0.394366	0.740385	0.6	0.14253	0.837838	0.40625	0.68	0.270979	0.921875	0.382979	0.777143	0.36856	0.888889	0.325	0.76	0.244989	0.923077	0.125	0.777143	0.0663856
Stacking	0	1	0.594286	#DIV/0!	1	0	0.634286	#DIV/0!	1	0	0.731429	#DIV/0!	1	0	0.771429	#DIV/0!	1	0	0.817143	#DIV/0!
StackingC	0	1	0.594286	#DIV/0!	1	0	0.634286	#DIV/0!	1	0	0.731429	#DIV/0!	1	0	0.771429	#DIV/0!	1	0	0.817143	#DIV/0!
ThresholdSelector	0.535211	0.548077	0.542857	0.0818274	0.675676	0.421875	0.582857	0.0978819	0.640625	0.553191	0.617143	0.174566	0.725926	0.375	0.645714	0.0927354	0.622378	0.5625	0.611429	0.145225
Vote	0	1	0.594286	#DIV/0!	1	0	0.634286	#DIV/0!	1	0	0.731429	#DIV/0!	1	0	0.771429	#DIV/0!	1	0	0.817143	#DIV/0!
ClassBalancedND	0.380282	0.740385	0.594286	0.128275	0.783784	0.484375	0.674286	0.278209	0.828125	0.510638	0.742857	0.341096	0.888889	0.5	0.8	0.408248	0.86014	0.3125	0.76	0.177068
DataNearBalancedND	0.380282	0.740385	0.594286	0.128275	0.783784	0.484375	0.674286	0.278209	0.828125	0.510638	0.742857	0.341096	0.888889	0.5	0.8	0.408248	0.86014	0.3125	0.76	0.177068
ND	0.380282	0.740385	0.594286	0.128275	0.783784	0.484375	0.674286	0.278209	0.828125	0.510638	0.742857	0.341096	0.888889	0.5	0.8	0.408248	0.86014	0.3125	0.76	0.177068
HyperPipes	0.605634	0.269231	0.405714	-0.131722	0.882883	0.046875	0.577143	-0.117379	0.953125	0.0851064	0.72	0.0730015	0.955556	0.075	0.754286	0.0580914	0.986014	0.0625	0.817143	0.125482
VFI	0.239437	0.701923	0.514286	-0.0645386	0.522523	0.515625	0.52	0.0367514	0.539062	0.617021	0.56	0.13836	0.592593	0.675	0.611429	0.225176	0.776224	0.6875	0.76	0.388072
ConjunctiveRule	0.239437	0.759615	0.548571	-0.00108994	0.792793	0.453125	0.668571	0.259171	0.867188	0.297872	0.714286	0.191617	0.911111	0.25	0.76	0.204063	0.972028	0.03125	0.8	0.00760569
DecisionTable	0	1	0.594286	#DIV/0!	0.774775	0.53125	0.685714	0.311783	0.882812	0.404255	0.754286	0.32158	0.866667	0.35	0.748571	0.235367	0.916084	0.46875	0.834286	0.411816
DTNB	0	1	0.594286	#DIV/0!	0.774775	0.53125	0.685714	0.311783	0.851562	0.468085	0.748571	0.334488	0.851852	0.375	0.742857	0.238145	0.888112	0.375	0.794286	0.277425
JRip	0.380282	0.673077	0.554286	0.0549836	0.792793	0.40625	0.651429	0.213508	0.84375	0.319149	0.702857	0.180499	0.881481	0.375	0.765714	0.282092	0.895105	0.375	0.8	0.289043
NNge	0.464789	0.625	0.56	0.0895948	0.792793	0.390625	0.645714	0.198002	0.898438	0.319149	0.742857	0.263056	0.911111	0.3	0.771429	0.2577	0.937063	0.125	0.788571	0.0914842
OneR	0.422535	0.557692	0.502857	-0.0195877	0.756757	0.453125	0.645714	0.2167	0.84375	0.297872	0.697143	0.158649	0.896296	0.25	0.748571	0.178581	0.888112	0.40625	0.8	0.30602
PART	0.43662	0.711538	0.6	0.15267	0.720721	0.390625	0.6	0.114963	0.835938	0.446809	0.731429	0.293427	0.896296	0.375	0.777143	0.306383	0.909091	0.28125	0.794286	0.221931
Ridor	0.323944	0.663462	0.525714	-0.013138	0.765766	0.4375	0.645714	0.211946	0.84375	0.468085	0.742857	0.323615	0.814815	0.525	0.748571	0.324164	0.86014	0.25	0.748571	0.116131
ZeroR	0	1	0.594286	#DIV/0!	1	0	0.634286	#DIV/0!	1	0	0.731429	#DIV/0!	1	0	0.771429	#DIV/0!	1	0	0.817143	#DIV/0!
AdTree	0.450704	0.625	0.554286	0.0757042	0.702703	0.4375	0.605714	0.141707	0.898438	0.382979	0.76	0.326694	0.896296	0.4	0.782857	0.330125	0.874126	0.46875	0.8	0.338828
BfTree	0.394366	0.634615	0.537143	0.0293618	0.711712	0.328125	0.571429	0.0417558	0.851562	0.361702	0.72	0.233837	0.903704	0.45	0.8	0.389022	0.888112	0.3125	0.782857	0.218032
DecisionStump	0.43662	0.605769	0.537143	0.0422974	0.711712	0.46875	0.622857	0.181719	0.828125	0.617021	0.771429	0.434171	0.859259	0.365854	0.744318	0.241032	0.916084	0.125	0.771429	0.0551006
FT	0.352113	0.721154	0.571429	0.0778864	0.684685	0.515625	0.622857	0.197928	0.789062	0.404255	0.685714	0.194649	0.874074	0.35	0.754286	0.246449	0.895105	0.25	0.777143	0.166012
J48	0.450704	0.615385	0.548571	0.0659461	0.756757	0.453125	0.645714	0.2167	0.828125	0.425532	0.72	0.263239	0.844444	0.275	0.714286	0.129754	0.874126	0.4375	0.794286	0.311626
J48graft	0.450704	0.615385	0.548571	0.0659461	0.756757	0.4375	0.64	0.201537	0.875	0.404255	0.748571	0.309426	0.888889	0.4	0.777143	0.317735	0.867133	0.25	0.754286	0.125346
LADTree	0.366197	0.692308	0.56	0.0610283	0.72973	0.5	0.645714	0.231331	0.867188	0.489362	0.765714	0.376337	0.844444	0.325	0.725714	0.179835	0.874126	0.5	0.805714	0.36552
LMT	0.478873	0.586538	0.542857	0.0647058	0.63964	0.484375	0.582857	0.121641	0.859375	0.489362	0.76	0.364928	0.859259	0.475	0.771429	0.34043	0.86014	0.21875	0.742857	0.0844212
NbTree	0.366197	0.682692	0.554286	0.0507816	0.801802	0.40625	0.657143	0.224595	0.882812	0.361702	0.742857	0.28036	0.903704	0.325	0.771429	0.270016	0.909091	0.28125	0.794286	0.221931
RandomForest	0.309859	0.788462	0.594286	0.111283	0.864865	0.421875	0.702857	0.323362	0.898438	0.425532	0.771429	0.367077	0.933333	0.375	0.805714	0.376377	0.951049	0.125	0.8	0.121121
RandomTree	0.43662	0.625	0.548571	0.0617621	0.612613	0.390625	0.531429	0.00319912	0.734375	0.340426	0.628571	0.0733869	0.725926	0.425	0.657143	0.137205	0.902098	0.34375	0.8	0.271578
REPTree	0.464789	0.605769	0.548571	0.0701319	0.765766	0.40625	0.634286	0.181287	0.859375	0.574468	0.782857	0.439955	0.881481	0.3	0.748571	0.20787	0.888112	0.28125	0.777143	0.187087
SimpleCart	0.422535	0.615385	0.537143	0.0380074	0.720721	0.453125	0.622857	0.176397	0.828125	0.382979	0.708571	0.222819	0.874074	0.35	0.754286	0.246449	0.839161	0.25	0.731429	0.0902724
